# DISEASES 2.0: a weekly updated database of disease–gene associations from text mining and data integration

Dhouha Grissa<sup>1</sup>, Alexander Junge <sup>\*1</sup>, Tudor I. Oprea<sup>1,2</sup>, and Lars Juhl Jensen<sup>1</sup>

<sup>1</sup>Novo Nordisk Foundation Center for Protein Research, Faculty of Health and Medical Sciences, University of Copenhagen, 2200, Copenhagen, Denmark.

<sup>2</sup>Department of Internal Medicine, Division of Translational Informatics, University of New Mexico Health Sciences Center, Albuquerque, NM, USA.

## Abstract

The scientific knowledge about which genes are involved in which diseases grows rapidly, which makes it difficult to keep up with new publications and genetics datasets. The DISEASES database aims to provide a comprehensive overview by systematically integrating and assigning confidence scores to evidence for disease–gene associations from curated databases, genome-wide association studies (GWAS), and automatic text mining of the biomedical literature. Here, we present a major update to this resource, which greatly increases the number of associations from all these sources. This is especially true for the text-mined associations, which have increased by at least 9-fold at all confidence cutoffs. We show that this dramatic increase is primarily due to adding full-text articles to the text corpus, secondarily due to improvements to both the disease and gene dictionaries used for named entity recognition, and only to a very small extent due to the growth in number of PubMed abstracts. DISEASES now also makes use of a new GWAS database, TIGA, which considerably increased the number of GWAS-derived disease–gene associations. DISEASES itself is also integrated into several other databases and resources, including GeneCards/MalaCards, Pharos/TCRD, and the Cytoscape stringApp. All data in DISEASES is updated on a weekly basis and is available via a web interface at <https://diseases.jensenlab.org>, from where it can also be downloaded under open licenses.

---

\*Present address: Corti, Copenhagen, Denmark

## 1 Introduction

To understand human diseases at the molecular level, we need a comprehensive overview of which genes are linked to each disease. Since these links can come from many types of data, each of which is growing at a fast rate, there is a need for frequently updated databases that integrate the heterogeneous evidence for disease–gene associations. To this end, we provide the freely available DISEASES database resource [1], which has been continuously updated on a weekly basis since 2014. This resource automatically extracts disease–gene associations from the biomedical literature by identifying mentions of disease and gene names and counting how often they are co-mentioned. These are combined with manually curated associations and experimental evidence from genome-wide association studies (GWAS).

The first version of DISEASES included text mining of 24 million abstracts available from the PubMed database, which has since grown by another 8 million new abstracts. Moreover, text mining of full-text articles can yield approximately 50% more disease–gene associations (at the same false positive rate) than text mining of the corresponding abstracts [2]. Combined with the rapid growth of open-access publishing [3], which allows for text mining and redistribution, this shows a clear opportunity for improving resources like DISEASES to go beyond text mining of abstracts only.

Text mining has been applied to many tasks in the biomedical domain, such as identifying genes and other named entities [4] in text and subsequently extracting associations between genes and other genes [5], pathways [6], and diseases [7]. Many studies have focused on doing the latter based on biomedical abstracts only [8], whereas fewer have included full-text articles too [9]. General text-mining efforts, not specifically focused on disease–gene associations, of course also extract such associations [10, 11].

DISEASES is not the only database to gather evidence of disease–gene associations. Such associations have for many years been manually annotated by curators of both general protein databases, such as UniProtKB/Swiss-Prot [12], and databases focused on genetics of diseases, such as Online Mendelian Inheritance in Man (OMIM) [13] and Medline-Plus from Genetics Home Reference (GHR) [14]. In addition to these broad databases, many specialist databases exist which focus on specific diseases or classes of diseases, including the cancer mutation databases Catalog of Somatic Mutations in Cancer (COSMIC) [15] and intOGen [16].

Genome-wide association studies (GWAS) are another important source of disease–gene associations, which comes with its own ecosystem of database resources. In GWAS, statistically significant associations between single nucleotide polymorphisms (SNPs) and phenotypic traits (including diseases) are identified and used to infer gene–trait associations. These associations, both at the SNP and gene level, are collected by the National Human Genome Research Institute (NHGRI)–European Bioinformatics Institute

(EBI) GWAS Catalog [17], GWAS Central [18] databases, and GWASdb  
45 [19]. However, GWAS results are complex to interpret; the identified SNPs  
are typically not the causal mutations, which due to linkage disequilibrium  
could reside anywhere within a chromosomal region that may contain mul-  
tiple genes [20]. Several secondary GWAS databases, such as DistiLD [21]  
and TIGA [22], thus aim to help non-experts interpret GWAS results by  
50 integrating other relevant information and prioritizing the results.

Several integrative database resources, like DISEASES, combine many  
of the types of evidence for disease–gene associations mentioned above.  
The best known of these are probably MalaCards/GeneCards [23] and Dis-  
GeNET [24], which take two very different approaches. The MalaCards and  
55 GeneCards databases present one page for each disease and gene, respec-  
tively, which gives the user a very comprehensive overview of the available  
information, including text mining from DISEASES. DisGeNET, on the  
other hand, has a strong focus on scoring the associations and on making  
data available amenable to further computational analysis via application  
60 programming interfaces (APIs). The latter is also true for knowledge-based  
aggregators such as Pharos [25] and Open Targets [26], which integrate  
many types of evidence from numerous sources, including gene–disease as-  
sociations.

In this paper, we describe the major improvements of the DISEASES  
65 resource made since the 2015 publication [1]. The gene set and associ-  
ated dictionary have been updated to be consistent with the latest ver-  
sion of STRING [27] and the text corpus in DISEASES is now automat-  
ically constructed by merging the open-access subset of PubMed Central  
(PMC) with PubMed abstracts. This has jointly led to substantial im-  
70 provements of the text-mining results. We have further updated DIS-  
EASES to import experimental data from a new GWAS resource, TIGA  
[22]. We map all disease–gene associations to a common set of identifiers  
and provide confidence scores for the associations, which are comparable  
across evidence types. All data are freely available both via a web interface  
75 (<https://diseases.jensenlab.org/>), as bulk download files, and through  
integration into other resources and tools, specifically Cytoscape, TIN-X,  
and Pharos.

## 2 Materials & Methods

The DISEASES database combines heterogeneous evidence from several  
80 sources. We will go through these, starting with three databases of manually  
curated disease–gene associations, followed by two sources of experimen-  
tal evidence, and finally the automatic text mining, which we break down  
into corpus construction, dictionary construction, named entity recognition  
(NER), and co-occurrence scoring. Finally, we describe how the DISEASES

85 confidence scores are assigned for each type of evidence.

## 2.1 MedlinePlus

The genetics section of the MedlinePlus resource, formerly known as Genetics Home Reference, includes disease–gene associations obtained from manual curation of the biomedical literature [14]. We first download the list  
90 of all diseases and then query the MedlinePlus REST API with each disease to retrieve the list of associated HGNC gene symbols. We then use the dictionaries described later to map the disease names and gene symbols to their Disease Ontology identifiers [28] and STRING v11 identifiers, respectively.

## 2.2 UniProt Knowledgebase (UniProtKB)

95 The Swiss-Prot section of UniProtKB consists of expert-reviewed protein entries, which include diseases associated with each protein among many other types of biological information [12]. We extract the diseases associated with a protein entry by parsing the keyword field, where they are specified using a controlled vocabulary. We manually mapped these to their corresponding  
100 concepts in Disease Ontology and used the dictionary described later to map the UniProtKB accession numbers to STRING v11 identifiers.

## 2.3 Amyloidoses Collection (AmyCo)

The AmyCo database specifically collects information on amyloidoses and other diseases related to amyloid deposition [29]. It contains data from  
105 249 articles on 75 diseases classified into two broad groups: amyloidoses and clinical conditions associated with amyloidosis, including precursors and proteins co-deposited with amyloid deposits. AmyCo identifiers are mapped to their corresponding Disease Ontology identifiers whenever the AmyCo name could be found as an exact synonym; otherwise the AmyCo identifier  
110 is mapped to the Disease Ontology broader parent(s).

## 2.4 Target Illumination by GWAS Analytics (TIGA)

TIGA [22] is a new weekly updated web resource that imports GWAS data from the NHGRI-EBI GWAS Catalog [17], maps SNPs to the nearest protein-coding genes, and evaluates the confidence of each gene–trait association.  
115 The latter is done by calculating an average rank score based on the number and distance of SNPs supporting the association, the p-value of the most significant SNP, and the number of studies supporting the association weighted by the Relative Citation Ratio [30] of the underlying publications. From TIGA, we extract the subset of traits that are diseases and map their  
120 Experimental Factor Ontology (EFO) terms to the corresponding Disease

Ontology terms based on ontology cross-references and the EMBL-EBI Ontology Xref Service. The Ensembl gene identifiers are mapped to STRING v11 identifiers using the gene dictionary described later.

## 2.5 Text corpora

125 As the starting point for doing text mining, a large body of biomedical texts is needed. We compile such a corpus based on the PMC open-access subset [3], which consists of 7.3 million full-text articles, and the PubMed abstract database, which contains 39 million entries, 22 million of which have an English abstract. To construct a combined corpus, we download both PMC  
130 and PubMed in XML format, specifically, the BioC version of PMC [31] and the PubMed baseline plus daily updates. The latter updates also mean that retracted articles are automatically removed from the corpus as soon as they have been marked as such in PubMed. As a last step, we exclude 826 publications, which are believed to contain falsified data and to have  
135 been created by several recently discovered paper mills [32].

As PMC contains articles in several languages and the text-mining pipeline in DISEASES is designed only for English text, we use the pre-trained language detection models from fastText [33] to identify the language of each PMC article and remove articles not in English. We next run the  
140 NER software (described later) on the English-language articles to count the number of unique entities found in each article. To eliminate articles that mention long lists of genes or diseases, we removed the 630 PMC articles that mentioned more than 200 genes or diseases. For quality reasons and to have consistent article metadata, we decided to only include articles from  
145 PMC that are indexed in PubMed. We thus used the identifier mapping file from PMC to convert PMIDs to PMIDs, and discarded all PMC articles for which a PMID did not exist. For the remaining articles, we merged the information from PMC and PubMed, using the metadata, title and abstract from PubMed and extending it with the article body text from PMC. Where  
150 no PMC open-access version of an article was available, we simply used the metadata, title, and abstract from PubMed.

The corpus in DISEASES is updated every weekend. All results presented in this paper are based on October 20th, 2021 version of the corpus (FullText2021). To assess the impact of including full-text open-access publications, we also have a second corpus (PubMed2021), which includes only  
155 the title and abstract text of the same publications. Finally, to be able to assess how much the general growth of PubMed contributes to the performance, we have a third corpus, which consists of  $\sim 24$  million abstracts published by end of 2013 (PubMed2013). This corpus closely resembles what  
160 was in the initial version of DISEASES, which was submitted in January 2014 [1].

## 2.6 Dictionaries

For mapping names and identifiers and for recognizing them in text, we need comprehensive dictionaries of human genes and diseases. The dictionary of  
165 diseases is constructed based on all the names and synonyms from Disease Ontology [28] and extended with additional amyloidoses from AmyCo, mappings to ICD-10, and manual additions of missing disease synonyms and acronyms. The human gene dictionary was obtained from STRING v11.0 [27] and is based on information from Ensembl [34], UniProtKB [12], and  
170 HGNC [35] databases. We further automatically eliminate clashes between HGNC gene symbols and disease names and extend both dictionaries with orthographic variations of names using the exact same rules as in the first version of DISEASES [1].

We frequently update the dictionaries to incorporate changes to Disease  
175 Ontology and to correct errors identified by users. In this paper we make use of two frozen versions of the dictionaries, namely one from October 20th, 2021 (Dict2.0) and, for comparison, the dictionaries from the first version of DISEASES [1] (Dict1.0). The latest dictionary is available from the Downloads tab of the DISEASES web resource.

## 180 2.7 Named entity recognition (NER)

To do NER on the very large text corpora described above — and make frequent updates feasible — a highly efficient tool for matching the dictionaries against the text is needed. As in the previous version of DISEASES, we do this using the Tagger software, which is described in detail elsewhere [36] (<https://github.com/larsjuhljensen/tagger>). Briefly, the  
185 combined dictionary is first loaded into memory in a custom hash table that allows fast, case-insensitive lookup and further allows for arbitrary insertion and deletion of hyphens. We then tokenize the text on white-space and special characters (including hyphen and slash) and look up combinations of  
190 tokens in the combined dictionary to identify left-most longest matches. To improve the precision, we globally block tagging of names that would otherwise give rise to many false positives by manually inspecting the tagging results of all names that occur more than 2000 times in PubMed as well as names that gave rise to errors reported by users. Each match in the text is  
195 normalized to the unique entity identifier from the dictionary and, in case of diseases, the term is backtracked to all parent terms in Disease Ontology.

## 2.8 Co-occurrence scoring

From the NER results, we calculate co-occurrence score between any given pair of a gene and a disease, which quantifies how much these entities have  
200 been mentioned together in the text corpus. The scoring scheme takes into

account that co-occurrences within sentences are stronger evidence than co-occurrences across sentences within a paragraph, which in turn are stronger than co-occurrences across paragraphs within a paper. The scoring scheme further takes into account both how much the entities co-occur on an absolute scale and relative to what would be expected by random chance. This approach is that same as was used in DISEASES v1 [1], except that the scoring having been extended to handle full-text articles as previously described [2].

## 2.9 Comparison to DISEASES v1

To facilitate comparison with DISEASES v1, which differs both in terms of the dictionaries and the text corpus used, we generated four datasets of text-mining results. These represent the following combinations of the old and new dictionaries (*Dict1.0* and *Dict2.0*) with text corpora representing the abstracts used in DISEASES v1 (*PubMed2013*), the full set of abstracts now available (*PubMed2021*), and the combined corpus including also full-text articles from PMC (*FullText2021*):

- (i) *Dict1, PubMed2013*: *PubMed2013* mined using *Dict1.0*, representing the text-mining channel of DISEASES v1 when published
- (ii) *Dict1, PubMed2021*: *PubMed2021* mined using *Dict1.0* to show the effect of updating DISEASES v1 with new abstracts
- (iii) *Dict2, PubMed2021*: *PubMed2021* mined using *Dict2.0* to capture the changes attributed to dictionary improvements
- (iv) *Dict2, FullText2021*: *FullText2021* mined using *Dict2.0*, representing the text-mining channel of DISEASES v2

### 2.9.1 Gold standard of disease–gene associations

To build an up-to-date gold standard of disease–gene associations, we followed the approach described in the original DISEASES publication [1]. We used the knowledge channel of manually curated annotations imported from UniProtKB and MedlinePlus (doi:10.6084/m9.figshare.17075708). A new reduced benchmarking set is then generated that includes only entity names explicitly annotated in UniProtKB and MedlinePlus and, with diseases broader parent terms. When an annotated disease was a child term of another annotated disease, we kept the broader parent terms and backtracked the child-term annotations to it via the *is.a* relationships in the ontology. The final gold standard comprises 7,005 of inferred disease–gene associations, all were given a high confidence score of 4 to 5 stars to show how they are biologically meaningful.

## 2.9.2 Benchmarking of text-mined associations

To evaluate and compare the quality of the text-mining results, we benchmarked each of the four sets of text-mining results (*Dict1.0\_PubMed2013*, *Dict1.0\_PubMed2021*, *Dict2.0\_PubMed2021*, and *Dict2.0\_FullText2021*) on the gold standard of disease–gene associations. Given a disease–gene association, we labeled it as positive if the association exists in the gold standard, labeled it as negative if both the disease and the gene (but not the association) exist in the gold standard, and otherwise discarded it. Based on this binary labeling, we constructed receiver operating characteristic (ROC) curves for each of the four sets of text-mining results by sorting the associations descending by score and plotting the true positive rate (TPR) against the false positive rate (FPR). To quantify the difference between the ROC curves, we calculated the area under curve (AUC) for each.

## 3 Results & Discussion

### 3.1 Overview of the DISEASES resource

Figure 1 gives an overview of the disease–gene associations in DISEASES by mapping them onto high-level terms in Disease Ontology that have at least 100 associated genes. For each disease term, the area shows the number of associations with a confidence score of at least 3 stars, which is further broken down based on the source of the associations (knowledge, experiments, or text mining). Automatic text mining is by far the biggest source of associations for all diseases, accounting for more than 60% of the total.

The category of diseases with the most associations, especially from knowledge and experiments, is *disease of anatomical entity*, within which we see a fairly even distribution across many anatomical systems. This is followed by *disease of cellular proliferation*, which almost exclusively covers cancer–gene associations. By contrast, we find quite few associations (7443) for *disease of infectious agent*, which come exclusively from text mining.

### 3.2 Growth of the number of disease-gene associations

The number of open access articles available from PMC has been grown exponentially over time, reaching more than 7 million as of September 2021. The inclusion of these — as well as the more than 8 million new PubMed abstracts published since the initial release of DISEASES in 2015 — has an obvious and direct effect on the number of disease–gene association one can find by text mining. While the text-mining channel in the DISEASES database is our main focus in this article, it is not the only improvement. Table 1 provides an overview of the content of the original and the new releases DISEASES database, showing the number of genes, diseases, and associations provided by each evidence channel.



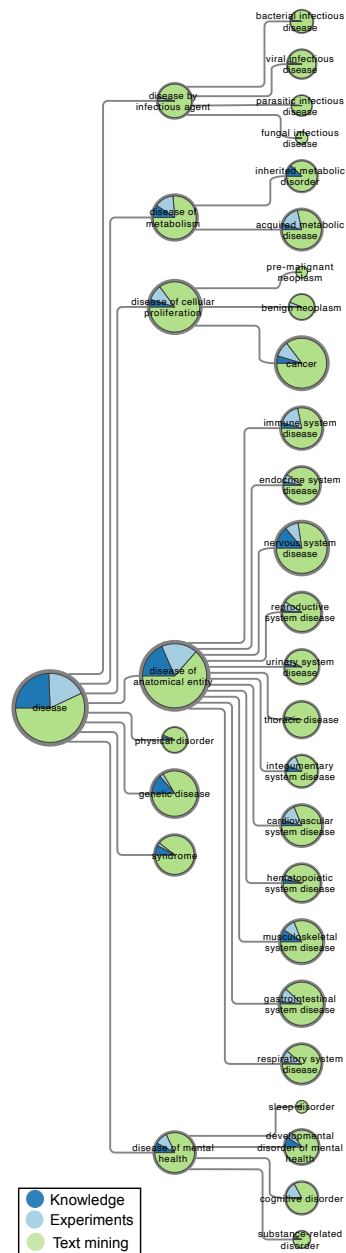

Figure 1: **Overview of disease–gene associations in DISEASES.** The number of disease–gene associations with a confidence score of at least 3 stars is proportional to the area of the pie charts, which represent high-level terms from Disease Ontology. In each pie chart, the associations are broken down by evidence type, i.e. curated knowledge, GWAS experiments, and automatic text mining of the literature.

The *Knowledge* channel has more than doubled in terms of both disease–gene associations and unique diseases covered. This growth comes primarily from GHR, which has in the meantime been integrated into MedlinePlus, but UniProtKB has also grown substantially. AmyCo contributes a comparably low number of new associations, since it covers only a specific type of diseases.

The *Experiments* channel has in many ways between the two versions. Replacing DistiLD with TIGA has increased the number GWAS-based associations by more than a factor of four and more than doubled the coverage of genes. However, with the new release we have also to remove COSMIC for license reasons, thus losing more than half of the experimental associations in the original release of DISEASES. All in all, the *Experiments* channels has grown by over 70%.

For the *Text mining* channel, we subdivide the evidence by their confidence scores as presented in the DISEASES web interface. That is, we present the number of genes, diseases, and associations that rated as 2-, 3-, and 4-star confidence as well as the total numbers for the channel (including association scoring below 2 stars). The number of associations has increased dramatically at all confidence levels and especially at high confidence levels, with over 9-fold increase overall and over 17-fold increase for 4-star associations. The same trend holds true when looking at the numbers of unique genes and diseases covered.

### 3.3 Improved quality of text-mined associations

We assessed the quality of the disease–gene associations from the new version of DISEASES to the originally published version by benchmarking both against a gold standard of manually annotated gene–disease associations (see Materials & Methods for details). The results are shown as ROC curves in Figure 2, which reveals a substantial improvement both overall (AUC increasing from 0.829 to 0.916) and in the low false-positive-rate part, which is arguably the most relevant part. As the ROC curve for the new version is consistently above that of the original one, the new version constitutes an improvement regardless of whether the user cares most about getting higher true positive rate or lower false positive rate.

This performance improvement is due to a combination of i) general growth in the number of biomedical abstracts available from PubMed, ii) improvements to the dictionaries used for NER, and iii) the addition of full-text articles from the PMC open access subset. To quantify the importance of each of these factors, we show two additional ROC curves in Figure 2: performance when updating with new abstracts but still using the original dictionaries and performance when further updating the dictionaries. Comparing the four ROC curves shows that the growth of PubMed abstracts alone gives only a small improvement of the AUROC from 0.845 to

| Evidence channel   | Associations     | Genes  | Diseases      |
|--------------------|------------------|--------|---------------|
| <b>Knowledge</b>   |                  |        |               |
| DISEASES 2021      | 36,448 (6,739)   | 3,723  | 1,528 (1,048) |
| AmyCo              | 1,225 (186)      | 57     | 180 (52)      |
| MedlinePlus        | 23,957 (3,516)   | 2,383  | 1,460 (966)   |
| UniProtKB          | 19,517 (3,739)   | 2,642  | 270 (119)     |
| DISEASES 2015      | 15,231 (2,953)   | 2,001  | 735 (453)     |
| GHR                | 7,551 (1,169)    | 965    | 671 (390)     |
| UniProtKB          | 11,576 (2,187)   | 1,651  | 271 (120)     |
| <b>Experiments</b> |                  |        |               |
| DISEASES 2021      | 152,611 (26,346) | 9,180  | 574 (295)     |
| TIGA               | 152,611 (26,346) | 9,180  | 574 (295)     |
| DISEASES 2015      | 89,073 (20,206)  | 10,711 | 423 (264)     |
| COSMIC             | 55,791 (13,050)  | 8,786  | 142 (76)      |
| DistiLD            | 36,650 (7,185)   | 4,315  | 351 (210)     |
| <b>Text mining</b> |                  |        |               |
| DISEASES 2021      | 4,512,870        | 19,116 | 8,537         |
| 4 star confidence  | 18,129           | 2,988  | 2,959         |
| 3 star confidence  | 224,642          | 11,207 | 6,711         |
| 2 star confidence  | 1,659,331        | 18,913 | 8,342         |
| DISEASES 2015      | 478,407          | 15,631 | 4,598         |
| 4 star confidence  | 1,044            | 478    | 662           |
| 3 star confidence  | 15,226           | 3,207  | 2,267         |
| 2 star confidence  | 142,892          | 12,706 | 4,354         |

Table 1: **Comparison of the new and original versions of DISEASES.** For each evidence channel we show the number of associations, unique genes, and unique diseases for both the new and the originally published version of DISEASES. In case of the *knowledge* and *experiments* channels, these numbers are further provided for each of the source databases. The numbers in parentheses are the counts before evidence was backtracked to parent terms in Disease Ontology. For the *text mining* channel, we instead subdivide the counts by confidence score.

0.859. The use of the new dictionaries leads to a bigger incremental improve-  
 320 ment, increasing the AUROC from 0.859 to 0.866. However, the addition  
 of full-text articles to the corpus is responsible for the biggest improvement,  
 bringing the AUROC from 0.866 to = 0.922.

These results show that while the growth of the literature does give  
 an almost free improvement, only requiring the pipeline to rerun on latest  
 325 PubMed, the vast majority of the improvement seen between the original  
 version of DISEASES and the new version stems from our work on improving  
 the dictionaries used for NER and on integrating full-text articles into the  
 corpus. The results also highlight how important it is for text mining efforts  
 to be permitted to process full-text articles rather than only abstracts.

### 3.4 Research paper mills

To the best of our knowledge, all assessment of text-mining results to date  
 have focused purely on the ability of a text-mining system to correctly ex-  
 tract what is stated in the text. However, from the perspective of using text

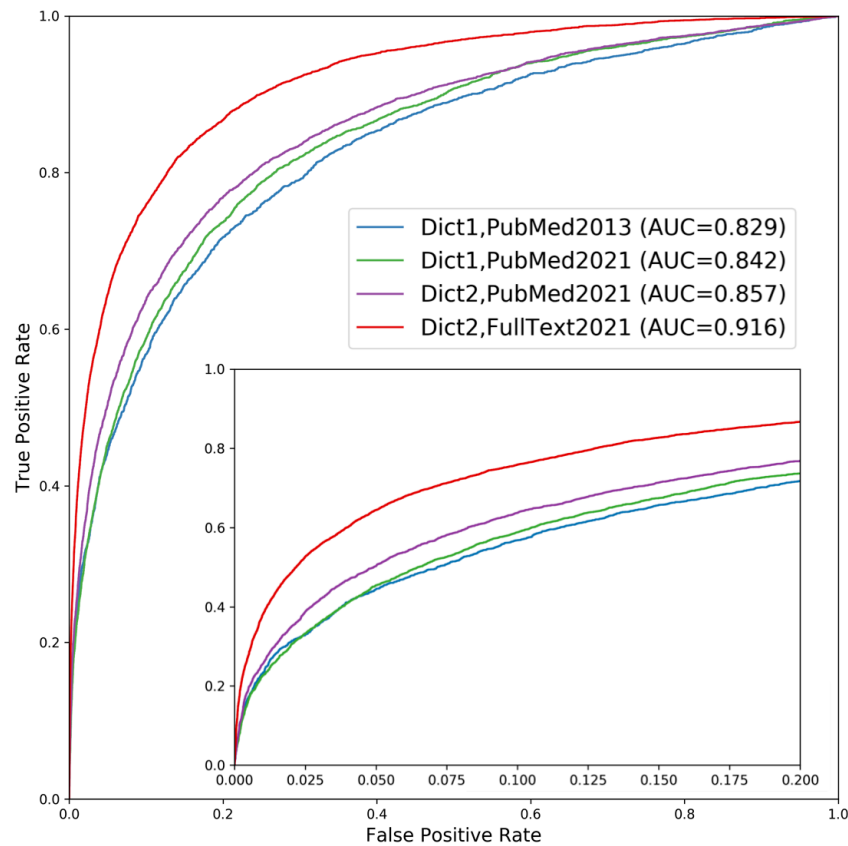

Figure 2: **Performance improvement of the *text mining* channel.** As shown in the receiver operating characteristic (ROC) curves, text mining performs markedly better in the new version of DISEASES (Dict2,FullText2021) compared to the originally published one (Dict1,PubMed2013). To quantify the sources of improvements, we show two additional curves: one using the new dictionary on the latest abstract collection only (Dict2,PubMed2021), and another using the old dictionary on the same abstracts (Dict1,PubMed2021). Comparing the curves reveals that most of the improvement stems from the addition of full-text articles, but that the new disease and gene dictionaries also led to considerable improvement. By contrast, the growth in PubMed abstracts from 2013 to 2021 made only a minor difference. The insert shows a zoom of the high-confidence part of the plot.

335 mining to construct a knowledgebase from literature, is equally important if what is stated in the text is true. Co-mentioning-based systems indirectly address this, since high-scoring associations will be supported by multiple publications.

Recently, the problem of incorrect information in the literature has become a bigger concern due to the discovery of so-called "paper mills". These  
340 appear to be companies that mass produce fake articles and sell them to researchers at Chinese hospitals [37]. As these articles were published in international journals indexed in PubMed, they would by default be included in our text corpus, thus providing false support for disease–gene associations in our database. To avoid this, we have compiled a list of the 826 papers identified so far to originate from paper mills (as per June 2021) and explicitly  
345 exclude these from our text corpus. To allow others to also easily exclude these papers, the latest list is available for download from the DISEASES website.

### 3.5 Integration into other resources

350 Just like DISEASES itself builds upon other databases, we have designed it to be easy to integrate into other resources. We do this both from a technical perspective by providing simple bulk download options and from a legal perspective by not integrating any data that would prevent us using an open license. Several tools and databases already take advantage of  
355 this, importing either disease–gene associations from all evidence channels or specifically the associations from text mining.

The GeneCards and MalaCards databases, both members of the GeneCards suite, provide a comprehensive overview of information on human genes, including diseases associations, by integrating evidence from  
360 150 sources [38]. One of these is the text-mined disease–gene associations from DISEASES, which GeneCards/MalaCards downloads on a regular basis and combines with associations from other source databases. The GeneCards/MalaCards web resources link back to DISEASES website to allow users to easily inspect the text-mining evidence for any given association. The Target Central Resource Database (TCRD) and the associated  
365 Pharos [25] and TIN-X web resources [39], which aim to shed light on potential new drug targets, similarly obtain up-to-date disease–gene associations from the DISEASES database. DISEASES (and "tagger" output) are also an integral part of Geneshot [40] and Harmonizome [41].

370 DISEASES is also designed to interface easily with the STRING, COMPARTMENTS and TISSUES resources by using the same gene identifiers. Through the Cytoscape app *stringApp*, it is thus possible to quickly retrieve a human protein network for any disease of interest [42]. To do this, *stringApp* first queries the DISEASES database to obtain a list of genes associated with the disease and subsequently queries STRING to obtain the  
375 corresponding protein network.

## 4 Conclusion

The DISEASES database has since 2014 provided the community with a weekly updated resource of disease–gene associations. The latest version  
380 features several important improvements compared to the original publica-  
tion. In addition to text mining PubMed, which has meantime grown by  
another 8 million abstracts, the DISEASES text corpus now also includes  
open access full-text articles from PubMed Central. Together with technical  
improvements to the text-mining pipeline itself, this has led to a > 9-fold  
385 increase in the number of disease–gene associations extracted at any con-  
fidence cutoff. DISEASES has also been upgraded to use GWAS data via  
the new TIGA database [22], which increased the number of experimental  
associations by more than 70%.

The database is freely available at <https://diseases.jensenlab.org/>  
390 where it can be browsed via a web interface as well as downloaded in its  
entirety to facilitate large-scale analysis. Moreover, DISEASES is designed  
to integrate easily with other resources, and the disease–gene associations  
are available through other resources, including the GeneCards/MalaCards  
and TCRD/Pharos databases, Harmonizome, Geneshot, and the Cytoscape  
395 stringApp.

**Acknowledgements** This work was supported by US National Institutes  
of Health grant U24 224370 for "Illuminating the Druggable Genome Knowl-  
edge Management Center" (IDG KMC), and by the Novo Nordisk Founda-  
tion (grant number NNF14CC0001).

## 400 References

- [1] S. Pletscher-Frankild, A. Pallejã, K. Tsafou, J. X. Binder, L. J. Jensen, DISEASES: Text mining and data integration of disease-gene associations, *Methods* 74 (2015) 83–89. doi:10.1016/j.ymeth.2014.11.020.
- [2] D. Westergaard, H.-H. Stærfeldt, C. Tønberg, L. J. Jensen, S. Brunak, A comprehensive and quantitative comparison of text-mining in 15 million full-text articles versus their corresponding abstracts, *PLOS Computational Biology* 14 (2) (2018) 1–16. doi:10.1371/journal.pcbi.1005962.  
405
- [3] D. C. Comeau, C.-H. Wei, R. Islamaj Doğan, Z. Lu, PMC text mining subset in BioC: about three million full-text articles and growing, *Bioinformatics* 35 (18) (2019) 3533–3535. doi:10.1093/bioinformatics/btz070.  
410
- [4] M.-T. Pandi, P. J. van der Spek, M. Koromina, G. P. Patrinos, A novel text-mining approach for retrieving pharmacogenomics associa-

- 415 tions from the literature, *Frontiers in pharmacology* 11 (2020) 602030. doi:10.3389/fphar.2020.602030.
- [5] I. Karadeniz, J. Hur, Y. He, A. Özgür, Literature mining and ontology based analysis of host-Brucella gene-gene interaction network., *Frontiers in microbiology* 6 (2015) 1386. doi:10.3389/fmicb.2015.01386.
- 420 [6] X. Qin, X. Yao, J. Xia, A novel metric to quantify the effect of pathway enrichment evaluation with respect to biomedical text-mined terms: Development and feasibility study, *JMIR medical informatics* 9 (2021) e28247. doi:10.2196/28247.
- [7] M. Simmons, A. Singhal, Z. Lu, Text Mining for Precision Medicine: Bringing Structure to EHRs and Biomedical Literature to Understand Genes and Health., *Advances in experimental medicine and biology* 939 (2016) 139–166. doi:0.1007/978-981-10-1503-8\_7.
- 425 [8] J. Zhou, B.-Q. Fu, The research on gene-disease association based on text-mining of PubMed, *BMC Bioinformatics* 19 (2018) 37. doi:10.1186/s12859-018-2048-y.
- 430 [9] J. Czarnecki, A. J. Shepherd, *Mining Biological Networks from Full-Text Articles*, Springer New York, New York, NY, 2014, pp. 135–145. doi:10.1007/978-1-4939-0709-0\_8.
- [10] T. K. Jenssen, A. Laegreid, J. Komorowski, E. Hovig, A literature network of human genes for high-throughput analysis of gene expression, *Nature genetics* 28 (1) (2001) 21–8. doi:10.1038/ng0501-21.
- 435 [11] Y. Tsuruoka, J. Tsujii, S. Ananiadou, FACTA: a text search engine for finding associated biomedical concepts, *Bioinformatics* 24 (21) (2008) 2559–60. doi:10.1093/bioinformatics/btn469.
- 440 [12] The UniProt Consortium, UniProt: the universal protein knowledge-base, *Nucleic Acids Research* 46 (D1) (2018) D158–D169. doi:10.1093/nar/gkw1099.
- [13] J. S. Amberger, C. A. Bocchini, A. F. Scott, A. Hamosh, OMIM.org: leveraging knowledge across phenotype–gene relationships, *Nucleic Acids Research* 47 (D1) (2018) D1038–D1043. doi:10.1093/nar/gky1151.
- 445 [14] C. Fomous, J. A. Mitchell, A. McCray, Genetics Home Reference: Helping patients understand the role of genetics in health and disease, *Community Genet* 9 (2006) 274–278. doi:10.1159/000094477.

- 450 [15] S. Forbes, G. Bhamra, S. Bamford, E. Dawson, C. Kok, J. Clements, A. Menzies, J. Teague, P. Futreal, M. Stratton, The Catalogue of Somatic Mutations in Cancer (COSMIC), Current protocols in human genetics doi:10.1002/0471142905.hg1011s57.
- 455 [16] F. Martínez-Jiménez, F. Muiños, I. Sentís, J. Deu-Pons, I. Reyes-Salazar, C. Arnedo-Pac, L. Mularoni, O. Pich, J. Bonet, H. Kranas, A. Gonzalez-Perez, N. Lopez-Bigas, A compendium of mutational cancer driver genes, Nature reviews. Cancer 20 (10) (2020) 555–572. doi:10.1038/s41568-020-0290-x.
- 460 [17] A. Buniello, J. A. MacArthur, M. Cerezo, L. W. Harris, J. Hayhurst, C. Malangone, McMahon, et al., The NHGRI-EBI GWAS Catalog of published genome-wide association studies, targeted arrays and summary statistics 2019, Nucleic Acids Research 47 (D1) (2018) D1005–D1012. doi:10.1093/nar/gky1120.
- 465 [18] T. Beck, T. Shorter, A. J. Brookes, GWAS Central: a comprehensive resource for the discovery and comparison of genotype and phenotype data from genome-wide association studies, Nucleic Acids Research 48 (D1) (2019) D933–D940. doi:10.1093/nar/gkz895.
- 470 [19] M. J. Li, Z. Liu, P. Wang, M. P. Wong, M. R. Nelson, J.-P. A. Kocher, M. Yeager, P. C. Sham, S. J. Chanock, Z. Xia, J. Wang, GWASdb v2: an update database for human genetic variants identified by genome-wide association studies, Nucleic Acids Research 44 (D1) (2015) D869–D876. doi:10.1093/nar/gkv1317.
- 475 [20] K. A. Frazer, S. S. Murray, N. J. Schork, E. J. Topol, Human genetic variation and its contribution to complex traits, Nature reviews. Genetics 10 (4) (2009) 241–251.
- [21] A. Pallejà, H. Horn, S. Eliasson, L. J. Jensen, DistiLD database: diseases and traits in linkage disequilibrium blocks, Nucleic Acids Research 40 (D1) (2011) D1036–D1040. doi:10.1093/nar/gkr899.
- 480 [22] J. J. Yang, D. Grissa, C. G. Lambert, C. G. Bologna, S. L. Mathias, A. Waller, D. J. Wild, L. J. Jensen, T. I. Oprea, TIGA: Target illumination GWAS analytics, Bioinformatics 37 (21) (2021) 3865–3873. doi:10.1093/bioinformatics/btab427.
- 485 [23] N. Rappaport, M. Twik, I. Plaschkes, R. Nudel, T. Iny Stein, J. Levitt, M. Gershoni, C. P. Morrey, M. Safran, D. Lancet, MalaCards: an amalgamated human disease compendium with diverse clinical and genetic annotation and structured search, Nucleic Acids Research 45 (D1) (2016) D877–D887. doi:10.1093/nar/gkw1012.



- 490 [24] J. Piñero, J. M. Ramírez-Anguita, J. Saüch-Pitarch, F. Ronzano, E. Centeno, F. Sanz, L. I. Furlong, The DisGeNET knowledge platform for disease genomics: 2019 update, *Nucleic Acids Research* 48 (D1) (2019) D845–D855. doi:10.1093/nar/gkz1021.
- 495 [25] T. K. Sheils, S. L. Mathias, K. J. Kelleher, V. B. Siramshetty, et al., TCRD and Pharos 2021: mining the human proteome for disease biology, *Nucleic Acids Research* 49 (D1) (2020) D1334–D1346. doi:10.1093/nar/gkaa993.
- [26] D. Ochoa, A. Hercules, M. Carmona, et al., Open Targets Platform: supporting systematic drug-target identification and prioritisation, *Nucleic acids research* 49 (D1) (2021) D1302–D1310. doi:10.1093/nar/gkaa1027.
- 500 [27] D. Szklarczyk, A. L. Gable, D. Lyon, A. Junge, S. Wyder, J. Huerta-Cepas, M. Simonovic, N. T. Doncheva, J. H. Morris, P. Bork, L. J. Jensen, C. v. Mering, STRING v11: protein–protein association networks with increased coverage, supporting functional discovery in genome-wide experimental datasets, *Nucleic Acids Research* 47 (D1) 505 (2018) D607–D613. doi:10.1093/nar/gky1131.
- [28] L. M. Schriml, E. Mitraka, J. Munro, B. Tauber, M. Schor, L. Nickle, et al., Human Disease Ontology 2018 update: classification, content and workflow expansion, *Nucleic Acids Research* 47 (D1) (2018) D955–D962. doi:10.1093/nar/gky1032.
- 510 [29] K. C. Nastou, G. I. Nasi, P. L. Tsiolaki, Z. I. Litou, V. A. Iconomidou, AmyCo: the amyloidoses collection, *Amyloid* 26 (3) (2019) 112–117. doi:10.1080/13506129.2019.1603143.
- [30] B. I. Hutchins, X. Yuan, J. M. Anderson, G. M. Santangelo, Relative Citation Ratio (RCR): A new metric that uses citation rates to measure 515 influence at the article level, *PLOS Biology* 14 (9) (2016) 1–25. doi:10.1371/journal.pbio.1002541.
- [31] R. I. Doğan, W. J. Wilbur, D. C. Comeau, BioC and simplified use of the PMC open access dataset for biomedical text mining, in: *Proceedings of the 4th Workshop on Building and Evaluating Resources for Health and Biomedical Text Processing*, 2014. 520
- [32] D. S. Chawla, A single ‘paper mill’ appears to have churned out 400 papers, sleuths find, *Sciencedoi:10.1126/science.abb4930*.
- [33] A. Joulin, E. Grave, P. Bojanowski, T. Mikolov, Bag of tricks for efficient text classification (2016).

- 525 [34] P. Flicek, I. Ahmed, M. R. Amode, D. Barrell, K. Beal, S. Brent, D. Carvalho-Silva, al., Ensembl 2013, *Nucleic Acids Research* 41 (D1) (2012) D48–D55. doi:10.1093/nar/gks1236.
- [35] K. A. Gray, L. C. Daugherty, S. M. Gordon, R. L. Seal, M. W. Wright, E. A. Bruford, *Genenames.org: the HGNC resources in 2013*, *Nucleic Acids Research* 41 (D1) (2012) D545–D552. doi:10.1093/nar/gks1066.
- 530
- [36] E. Pafilis, S. Pletscher-Frankild, L. Fanini, S. Faulwetter, C. Pavloudi, A. Vasileiadou, C. Arvanitidis, L. J. Jensen, The SPECIES and ORGANISMS resources for fast and accurate identification of taxonomic names in text., *PLOS ONE* 8 (6). doi:10.1371/journal.pone.0065390.
- 535
- [37] H. Else, R. Van Noorden, The fight against fake-paper factories that churn out sham science, *Nature* 591 (7851) (2021) 516–519. doi:10.1038/d41586-021-00733-5.
- [38] G. Stelzer, N. Rosen, I. Plaschkes, S. Zimmerman, et al., The GeneCards suite: From gene data mining to disease genome sequence analyses, *Current Protocols in Bioinformatics* 54 (1) (2016) 1.30.1–1.30.33. doi:<https://doi.org/10.1002/cpbi.5>.
- 540
- [39] D. C. Cannon, J. J. Yang, S. L. Mathias, et al., TIN-X: target importance and novelty explorer, *Bioinformatics (Oxford, England)* 33 (16) (2017) 2601–2603. doi:10.1093/bioinformatics/btx200.
- 545
- [40] A. Lachmann, B. M. Schilder, M. L. Wojciechowicz, D. Torre, M. V. Kuleshov, A. B. Keenan, A. Ma’ayan, Geneshot: search engine for ranking genes from arbitrary text queries, *Nucleic acids research* 47 (W1) (2019) W571–W577. doi:10.1093/nar/gkz393.
- 550
- [41] A. D. Rouillard, G. W. Gundersen, N. F. Fernandez, Z. Wang, C. D. Monteiro, M. G. McDermott, A. Ma’ayan, The harmonizome: a collection of processed datasets gathered to serve and mine knowledge about genes and proteins, *Database : the journal of biological databases and curation* 2016. doi:10.1093/database/baw100.
- 555
- [42] N. T. Doncheva, J. H. Morris, J. Gorodkin, L. J. Jensen, Cytoscape StringApp: Network analysis and visualization of proteomics data, *Journal of Proteome Research* 18 (2) (2019) 623–632. doi:10.1021/acs.jproteome.8b00702.
